# Supplementary material
Source: Springer Nature journal article supplement (https://www.springermedizin.de/resource/supplementary/12887_2006_158_MOESM3_ESM.pdf/9477392)

**Baseline - 33.9% Wz**

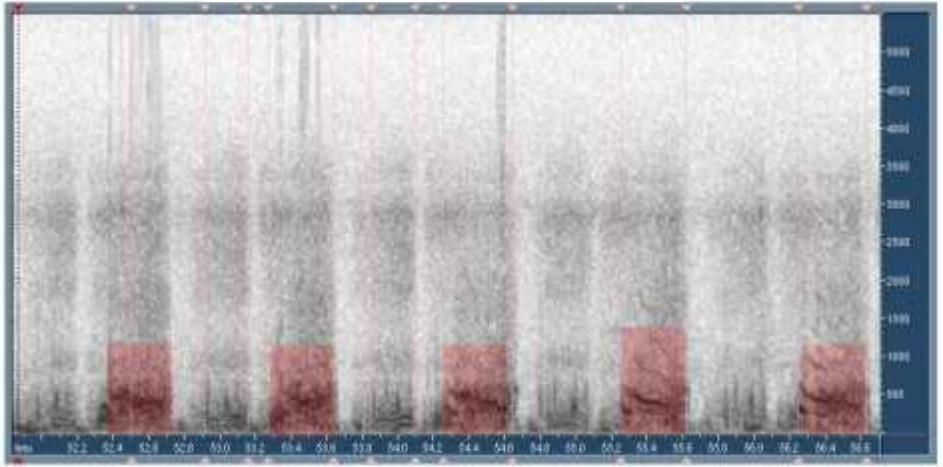

**Frequency (Hz)**

**After 10 min - 0% Wz**

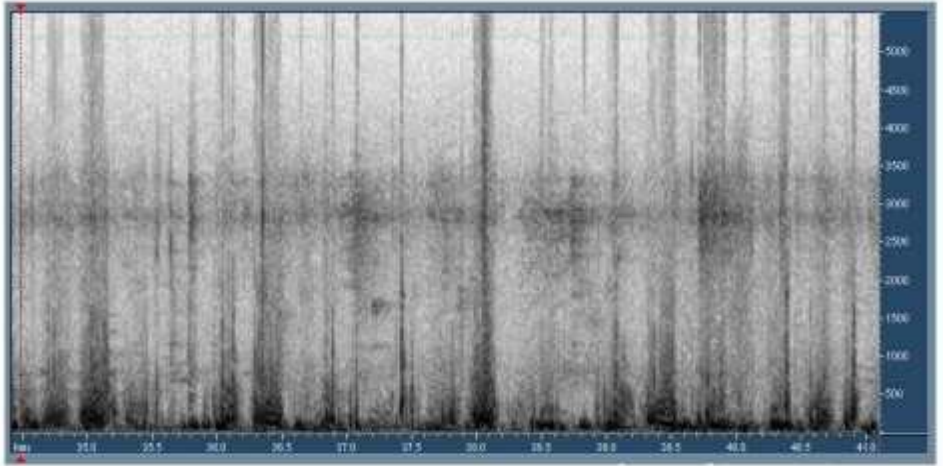

**Frequency (Hz)**

**After 30 min - 11.9% Wz**

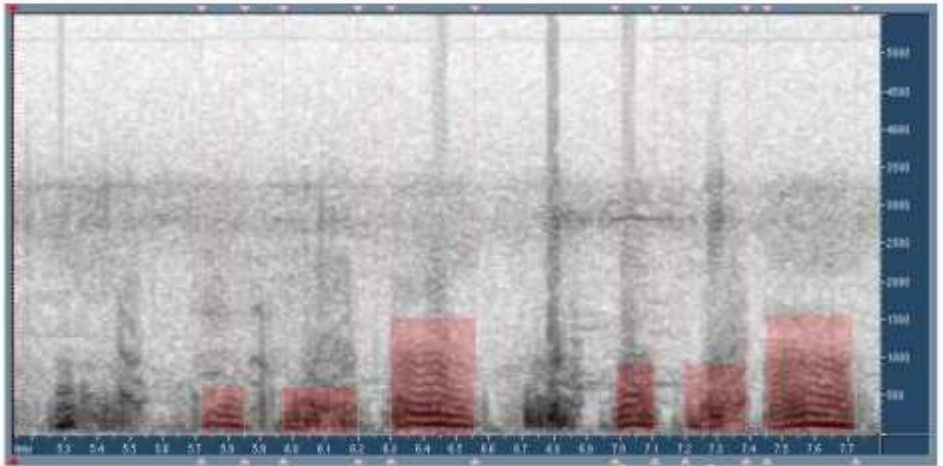

**Frequency (Hz)**

**Time (sec)**

Supplement: MOESM3 [file 9477392]
